# Supplementary material for: Surface structure-dependent electrocatalytic reduction of CO2 to C1 products on SnO2 catalysts
Source: Royal Society of Chemistry journal article supplement (doi:10.1039/c9se00678h), 2019-12-02
Supplement: c9se00678h1.pdf [file c9se00678h1.pdf]

Electronic Supplementary Information for

## Surface Structure-Dependent Electrocatalytic Reduction of CO<sub>2</sub> to C1 Products on SnO<sub>2</sub> Catalysts

Minling Fang,<sup>a</sup> Zhiping Zheng,<sup>a</sup> Jiayu Chen,<sup>a</sup> Qian Chen,<sup>a</sup> Binbin Xu,<sup>a</sup> Deyu Liu,<sup>c</sup> Jianyang Wu,<sup>a</sup> Qin Kuang,<sup>a,\*</sup> and Zhaoxiong Xie,<sup>a,b,\*</sup>

<sup>a</sup> State Key Laboratory of Physical Chemistry of Solid Surfaces & Department of Chemistry, College of Chemistry and Chemical Engineering, Xiamen University, Xiamen 361005 (P. R. China). E-mail: [qkuang@xmu.edu.cn](mailto:qkuang@xmu.edu.cn); [zxxie@xmu.edu.cn](mailto:zxxie@xmu.edu.cn). Fax: (+) 86-592-2183047.

<sup>b</sup> Pen-Tung Sah Institute of Micro-Nano Science and Technology, Xiamen University, Xiamen 361005, China.

<sup>c</sup> Ningbo Institute of Materials Technology & Engineering, Chinese Academy of Sciences. 1219 Zhongguan West Road, Ningbo 315201, China.

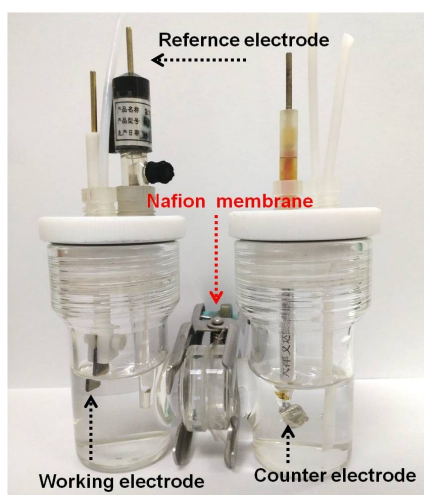

**Fig. S1** Schematic illustration of the electrochemical reduction of CO<sub>2</sub> with an H-type 3 electrode cell.

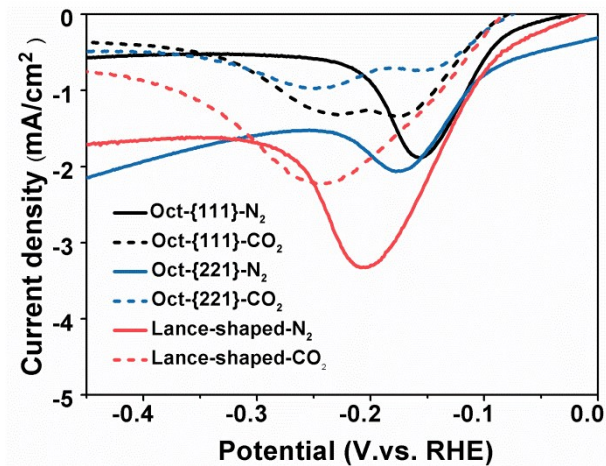

**Fig. S2** a) LSVs of SnO<sub>2</sub> in N<sub>2</sub>/CO<sub>2</sub> saturated 0.5 M NaHCO<sub>3</sub> solution; Chronoamperograms for b) Oct-{111}-SnO<sub>2</sub>, c) Oct-{221}-SnO<sub>2</sub> and d) Rod-{110} SnO<sub>2</sub> at different potential in CO<sub>2</sub> saturated 0.5 M NaHCO<sub>3</sub>.

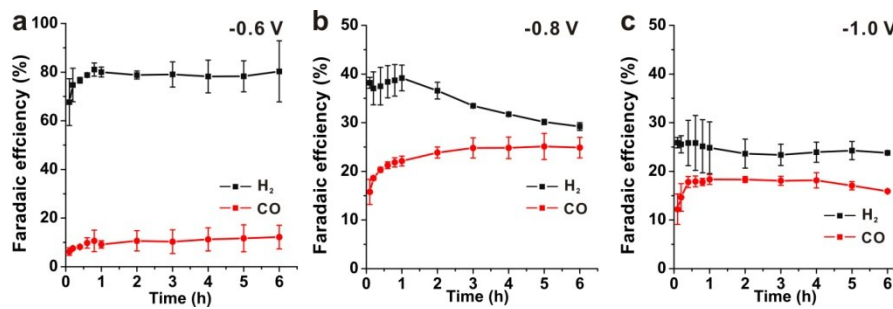

**Fig. S3** Faradaic efficiency of H<sub>2</sub> (black line) and CO (red line) for Oct-{221} at different potentials in CO<sub>2</sub>-saturated 0.5 M NaHCO<sub>3</sub> aqueous solution.

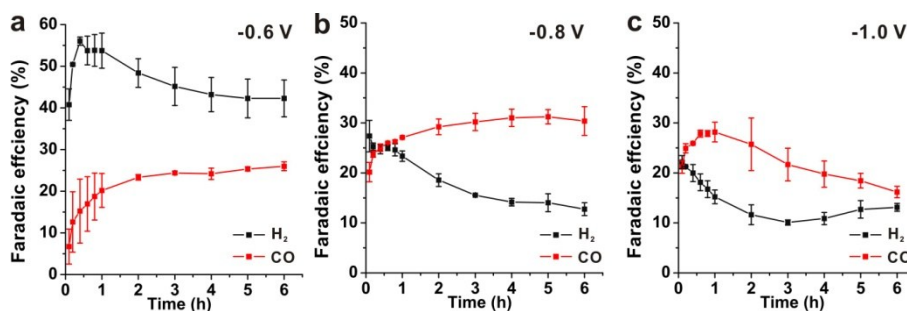

**Fig. S4** Faradaic efficiency of H<sub>2</sub> (black line) and CO (red line) for Rod-{110} at different potentials in CO<sub>2</sub>-saturated 0.5 M NaHCO<sub>3</sub> aqueous solution.

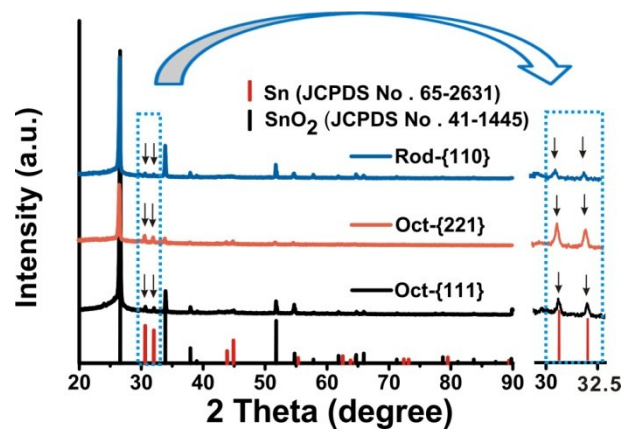

**Fig. S5** XRD patterns of different facets SnO<sub>2</sub> after ECR.

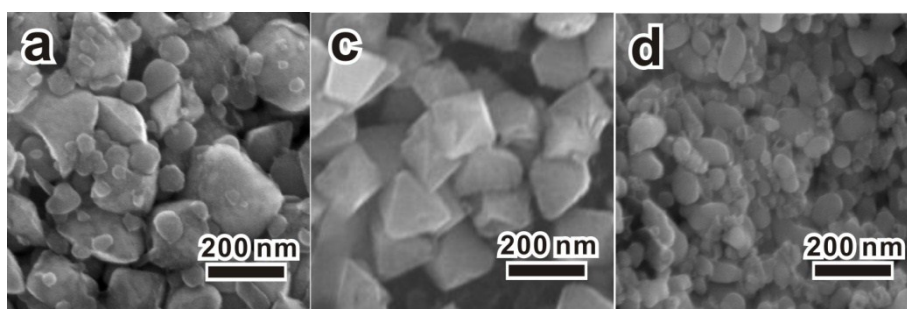

**Fig. S6** SEM images of a) Oct-{111}, b) Oct-{221} and c) Rod-{110} after electroreduction catalysis.
